# Supplementary material for: Development and validation of a predictive model for the progression of diabetic kidney disease to kidney failure
Source: PubMed Central journal article supplement (PMC7946054; doi:10.1080/0886022x.2020.1772294), 2020-06-11
Supplement: IRNF_A_1772294_SM3395.pdf [file IRNF_A_1772294_SM3395.pdf]

**Supplementary Table S 1 C statistics, AICs and p values for the H-L test for clinical model through 5-fold cross-validation**

|                                | 1        | 2        | 3        | 4        | 5        | Average   |
|--------------------------------|----------|----------|----------|----------|----------|-----------|
| <b>C statistics</b>            |          |          |          |          |          |           |
| Training cohort                | 0.5424   | 0.7043   | 0.5447   | 0.6917   | 0.6488   | 0.62638   |
| Internal validation cohort     | 0.5975   | 0.6279   | 0.5685   | 0.6251   | 0.6381   | 0.61142   |
| <b>AIC</b>                     |          |          |          |          |          |           |
| Training cohort                | 656.0846 | 669.4681 | 660.6336 | 673.6844 | 668.3239 | 665.63892 |
| Internal validation cohort     | 175.931  | 164.9479 | 164.9241 | 164.0962 | 166.5837 | 167.29658 |
| <b>P value of the H-L test</b> |          |          |          |          |          |           |
| Training cohort                | 0.0701   | 0.5044   | 0.4457   | 0.2735   | 0.2801   | 0.31476   |
| Internal validation cohort     | 0.3479   | 0.7054   | 0.9527   | 0.2606   | 0.3551   | 0.52434   |

**Supplementary Table S 2 C statistics, AICs and p values for the H-L test for laboratory model through 5-fold cross-validation**

|                                | 1        | 2        | 3        | 4        | 5        | Average   |
|--------------------------------|----------|----------|----------|----------|----------|-----------|
| <b>C statistics</b>            |          |          |          |          |          |           |
| Training cohort                | 0.9814   | 0.9935   | 0.9803   | 0.9887   | 0.9863   | 0.98604   |
| Internal validation cohort     | 0.9842   | 0.9836   | 0.9832   | 0.987    | 0.9785   | 0.9833    |
| <b>AIC</b>                     |          |          |          |          |          |           |
| Training cohort                | 147.0635 | 160.5374 | 141.4085 | 151.8645 | 153.4615 | 150.86708 |
| Internal validation cohort     | 48.91191 | 36.3329  | 50.04142 | 45.67093 | 39.29448 | 44.050328 |
| <b>P value of the H-L test</b> |          |          |          |          |          |           |
| Training cohort                | 0.584    | 0.9909   | 0.5546   | 0.651    | 0.9935   | 0.7548    |
| Internal validation cohort     | 0.61     | 0.9906   | 0.9783   | 0.8909   | 0.6168   | 0.81732   |

**Supplementary Table S 3 C statistics, AICs and p values for the H-L test for lab-medication model through 5-fold cross-validation**

|                            | 1        | 2        | 3        | 4        | 5        | Average   |
|----------------------------|----------|----------|----------|----------|----------|-----------|
| <b>C statistics</b>        |          |          |          |          |          |           |
| Training cohort            | 0.9816   | 0.9928   | 0.9788   | 0.9905   | 0.9863   | 0.986     |
| Internal validation cohort | 0.9833   | 0.9834   | 0.9837   | 0.9844   | 0.9779   | 0.98254   |
| <b>AIC</b>                 |          |          |          |          |          |           |
| Training cohort            | 147.3495 | 158.1786 | 138.6844 | 152.8755 | 149.8149 | 149.38058 |
| Internal validation cohort | 47.39587 | 38.32457 | 51.8203  | 42.0026  | 41.26346 | 44.16136  |

| <b>P value of the H-L test</b> |        |        |        |        |        |         |
|--------------------------------|--------|--------|--------|--------|--------|---------|
| Training cohort                | 0.5103 | 0.5702 | 0.4368 | 0.1563 | 0.5183 | 0.43838 |
| Internal validation cohort     | 0.2564 | 0.9918 | 0.9792 | 0.723  | 0.6136 | 0.7128  |

**Supplementary Table S 4 C statistics, AICs and p values for the H-L test for full model through 5-fold cross-validation**

|                                | <b>1</b> | <b>2</b> | <b>3</b> | <b>4</b> | <b>5</b> | <b>Average</b> |
|--------------------------------|----------|----------|----------|----------|----------|----------------|
| <b>C statistics</b>            |          |          |          |          |          |                |
| Training cohort                | 0.9764   | 0.9921   | 0.9831   | 0.9917   | 0.9856   | 0.98578        |
| Internal validation cohort     | 0.982    | 0.9749   | 0.9519   | 0.9834   | 0.9834   | 0.97512        |
| <b>AIC</b>                     |          |          |          |          |          |                |
| Training cohort                | 131.7514 | 152.3792 | 138.5493 | 148.0614 | 142.499  | 142.64806      |
| Internal validation cohort     | 50.99661 | 33.43646 | 34.62429 | 43.13019 | 42.4558  | 40.92867       |
| <b>P value of the H-L test</b> |          |          |          |          |          |                |
| Training cohort                | 0.9816   | 0.2225   | 0.9966   | 0.1319   | 0.3671   | 0.53994        |
| Internal validation cohort     | 0.2389   | 1        | 0.3155   | 0.9931   | 0.002302 | 0.5099604      |
